# Supplementary figures and images for: Prolonged Sleep Latency and Reduced REM Latency Are Associated with Depressive Symptoms in a Japanese Working Population
Source: MDPI journal article supplement (doi:10.3390/ijerph19042112), 2022-02-13

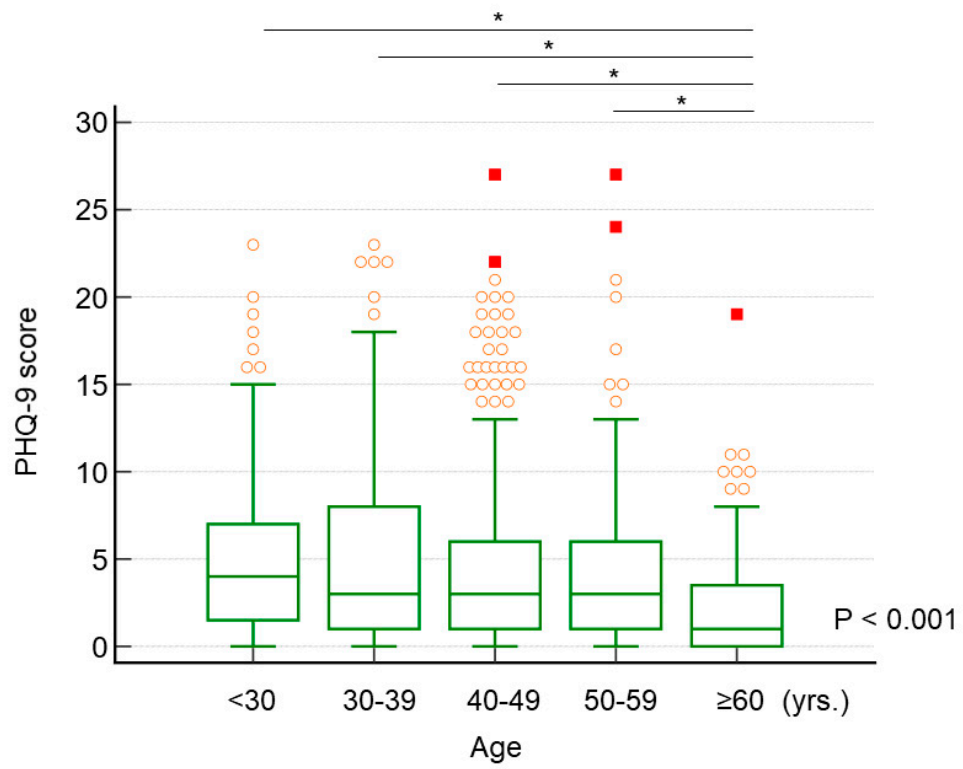

**Figure S1.** PHQ-9 scores vs. age.

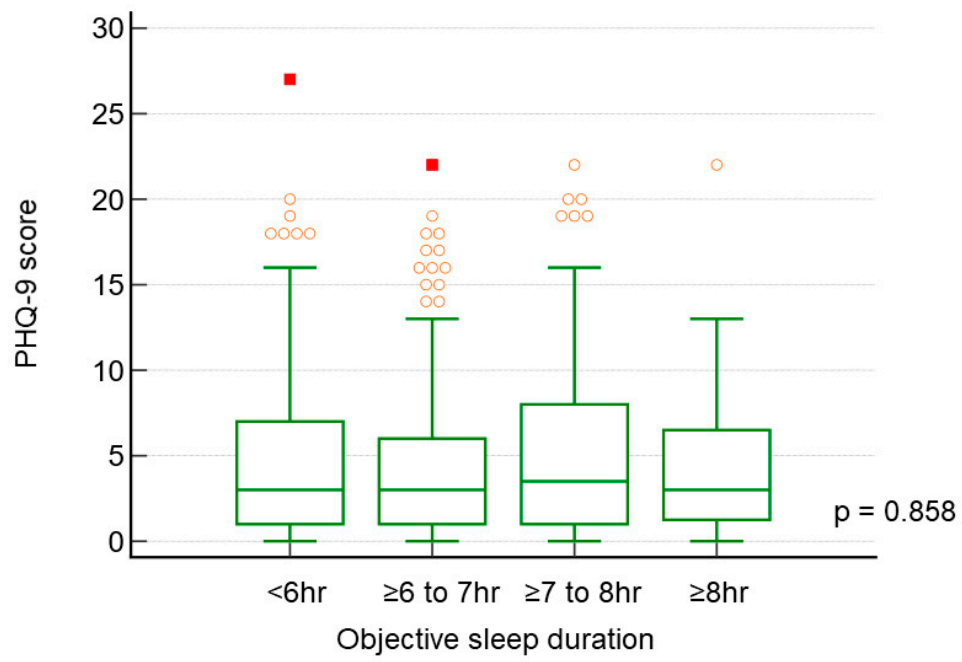

**Figure S2.** PHQ-9 scores vs. SPT.

Supplement: s1 [file s1]
